# Supplementary material
Source: publisher figshare collection journal article supplement (https://acs.figshare.com/ndownloader/files/6904790)
Supplement: Supplementary file 1 [file 6904790]

## Supporting information

### Formation of Copper Nanoparticles in LTL Nanosized Zeolite: Kinetics Study

A. Kharchenko,<sup>a,b</sup> O. I. Lebedev,<sup>c</sup> V. Zholobenko,<sup>d</sup> V. de Waele,<sup>b</sup> S. Mintova<sup>a,\*</sup>

<sup>a</sup>Laboratoire Catalyse et Spectrochimie (LCS), ENSICAEN, Université de Caen, CNRS, 14050 Caen, France

<sup>b</sup>Laboratoire de Spectrochimie Infrarouge et Raman (LASIR), Université de Lille I, CNRS, 59655 Villeneuve d'Ascq Cedex, France

<sup>c</sup>Laboratoire de Cristallographie et Sciences des Matériaux (CRISMAT), ENSICAEN, CNRS, 14050 Caen, France

<sup>d</sup>Keele University, Keele, Staffordshire ST5 5BG, UK

(A)

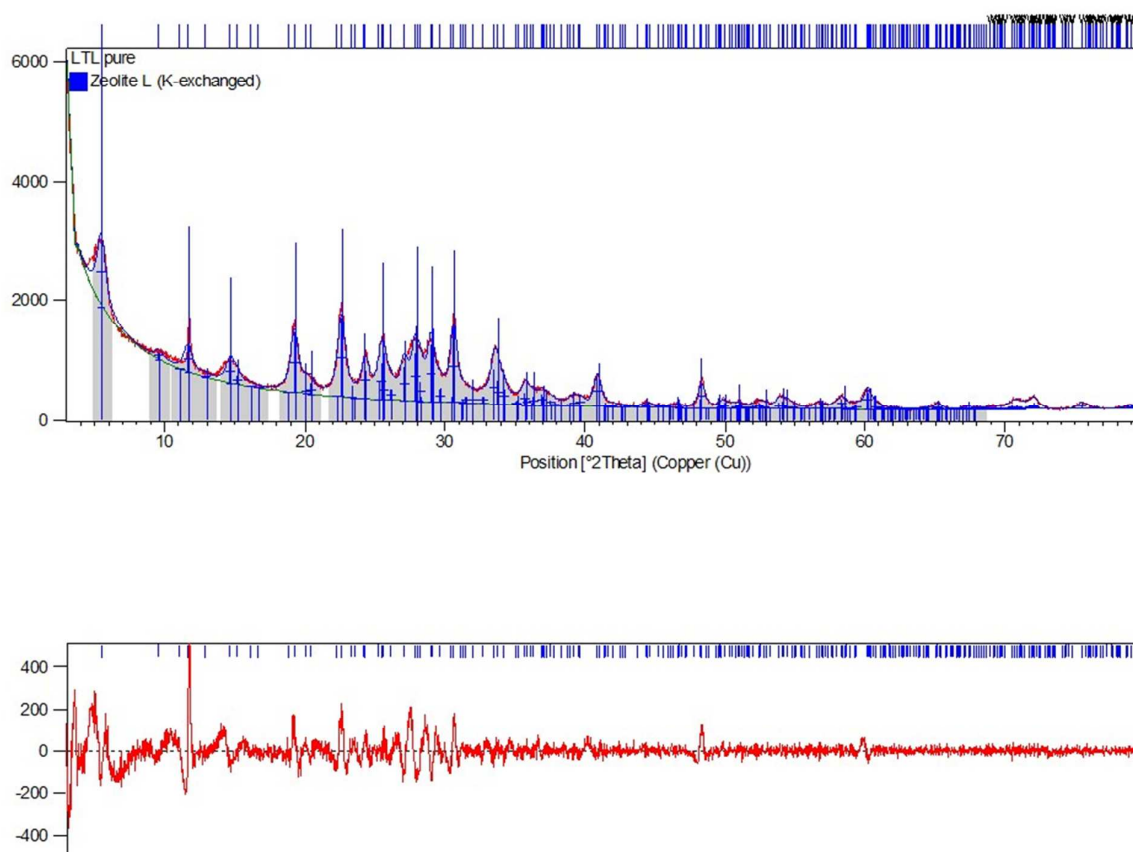

(B)

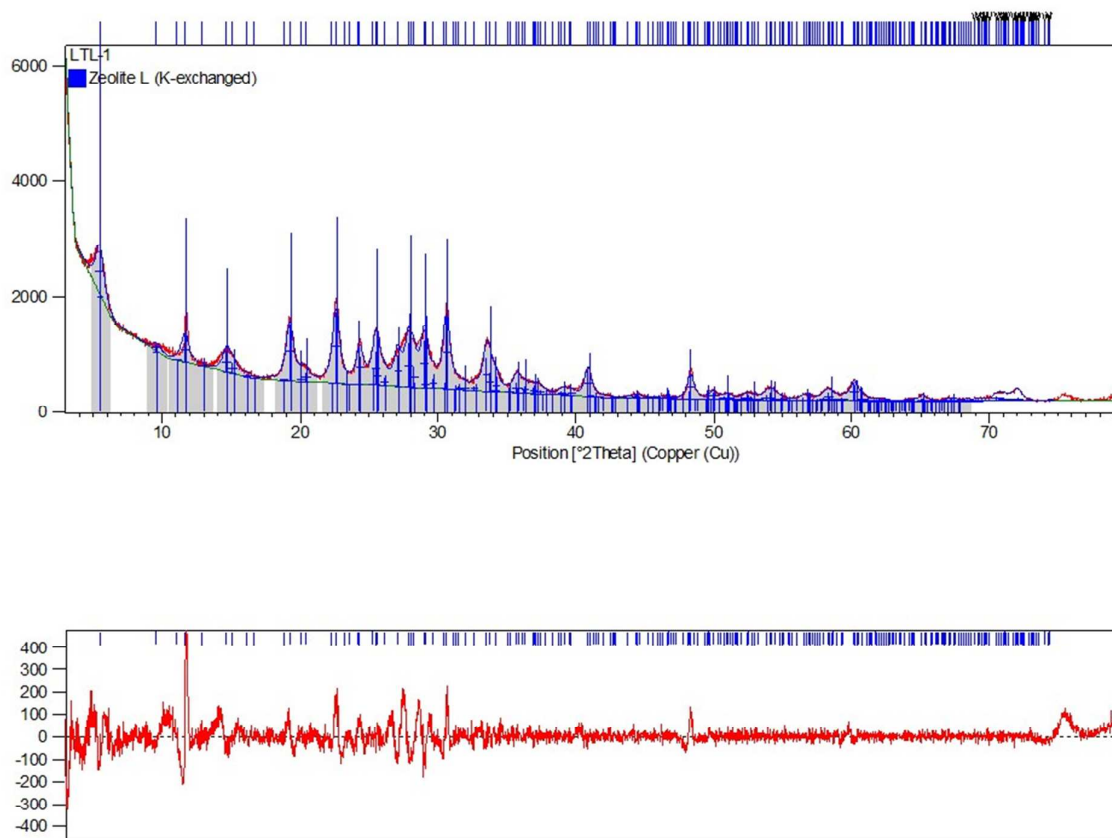

*Figure S1* Pawley fit of the XRD patterns and difference diagram between calculated and experimental data of (A) parent LTL and (B)  $\text{Cu}^0$ -LTL; a unit cell is used to generate the initial peak list, as a reference pattern the Zeolite LTL (K-exchanged) (No. 98-003-5486) was used.

*Table S1* Agreement indices for the Pawley fit of the parent LTL and  $\text{Cu}^0$ -LTL.

| Agreement Indices         | Parent LTL | $\text{Cu}^0$ -LTL |
|---------------------------|------------|--------------------|
| <b>R expected</b>         | 3.7244     | 3.6959             |
| <b>R profile</b>          | 4.3126     | 4.1496             |
| <b>Weighted R profile</b> | 5.6025     | 5.8898             |
| <b>D-statistics</b>       | 0.2734     | 0.3293             |
| <b>Goodness of Fit</b>    | 1.5043     | 1.5936             |

*Table S2* Chemical composition of parent LTL and Cu<sup>2+</sup>-LTL samples

| Element   | Series   | Parent LTL |       | Cu <sup>2+</sup> -LTL |       |
|-----------|----------|------------|-------|-----------------------|-------|
|           |          | % wt.      | % at. | % wt.                 | % at. |
| Silicon   | K-series | 13.15      | 55.77 | 16.54                 | 55.58 |
| Aluminium | K-series | 5.34       | 23.57 | 6.65                  | 23.26 |
| Potassium | K-series | 6.78       | 20.66 | 7.8                   | 18.83 |
| Copper    | K-series | -          | -     | 1.57                  | 2.33  |

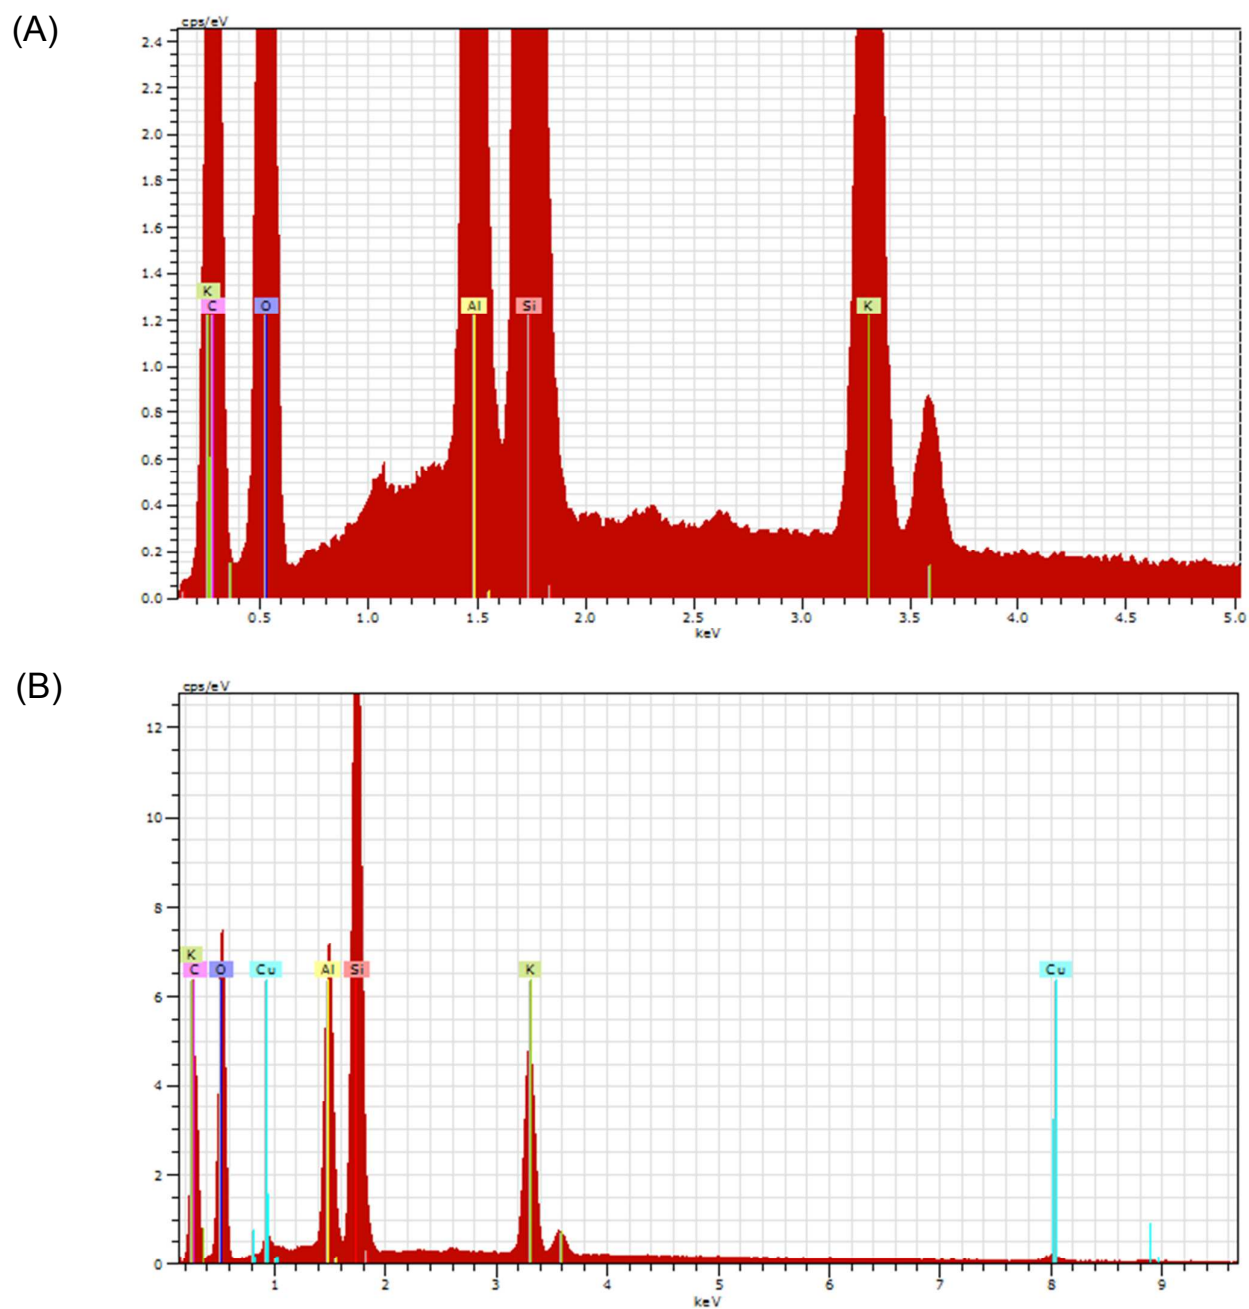

*Figure S2* Elemental composition of the (A) parent LTL and (B)  $\text{Cu}^{2+}$ -LTL samples measured by EDX-SEM (C corresponds to the carbon film)



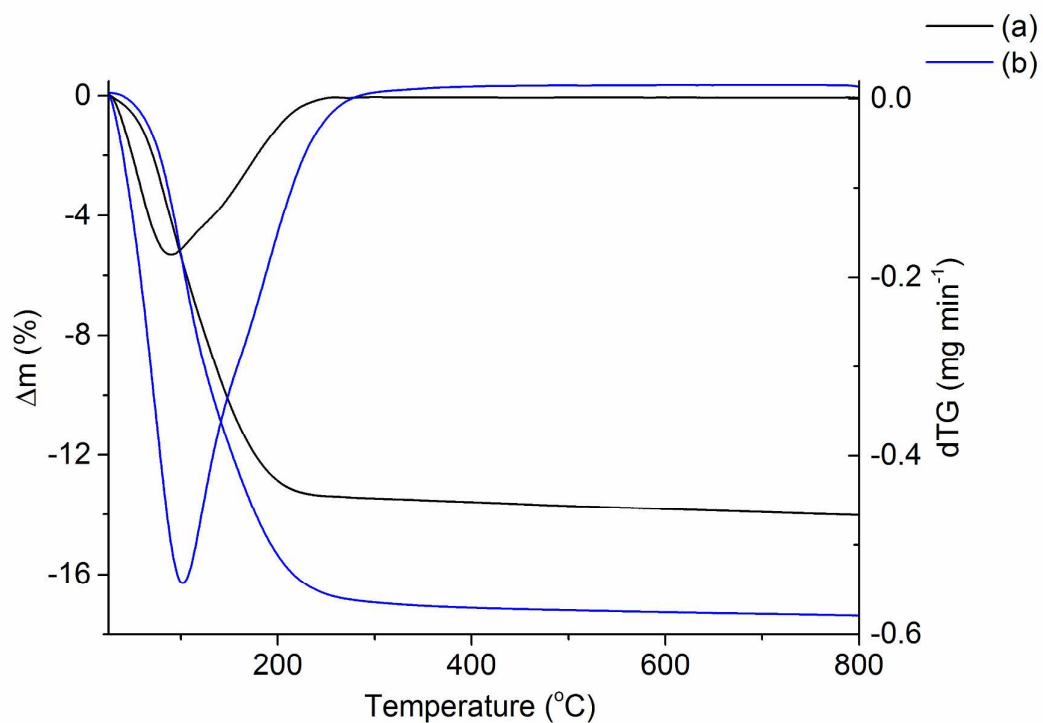

*Figure S3* TG and dTG curves for (a) parent LTL and (b) Cu<sup>2+</sup>-LTL samples. The weight loss below 200 °C corresponds to removal of water. The total amount of water for parent LTL and Cu<sup>2+</sup>-LTL was about 14.5%, 17.9%, respectively

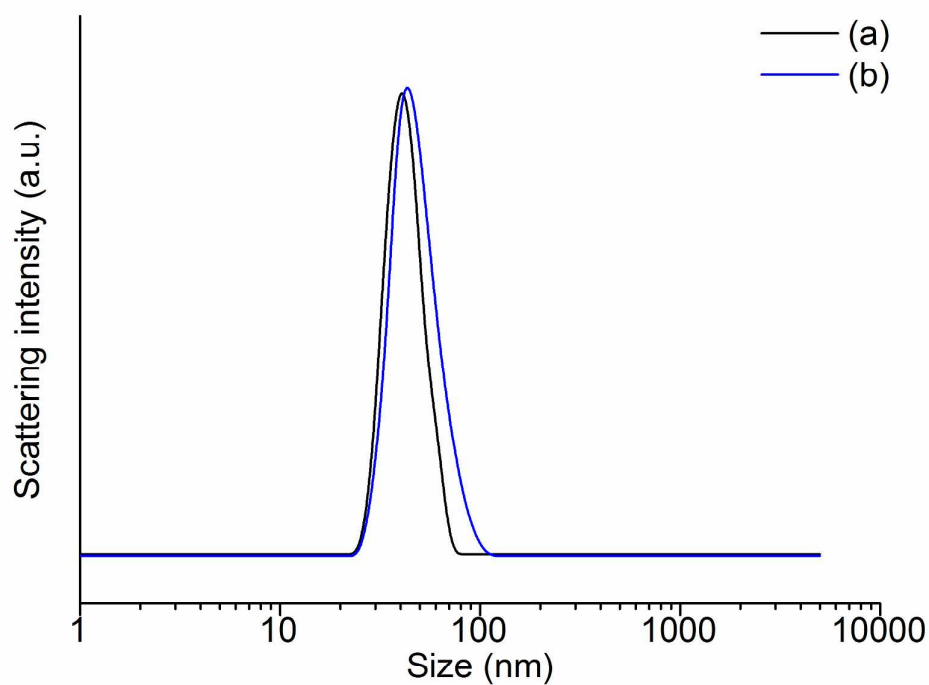

*Figure S4* Particle size distribution of (a) parent LTL and (b)  $\text{Cu}^{2+}$ -LTL samples measured by DLS. As the particles are not spherical, DLS gives the diameter of a sphere that has the same average translational diffusion coefficient as the particle being measured. The DLS-curves show that both materials have monomodal particle size distribution. Parent LTL and  $\text{Cu}^{2+}$ -LTL exhibit maximum values at around 40 nm. While TEM images show rectangular crystalline domains with well-defined edges with the size of 10 – 15 nm that are aggregated to bigger entities presented by the DLS curves.

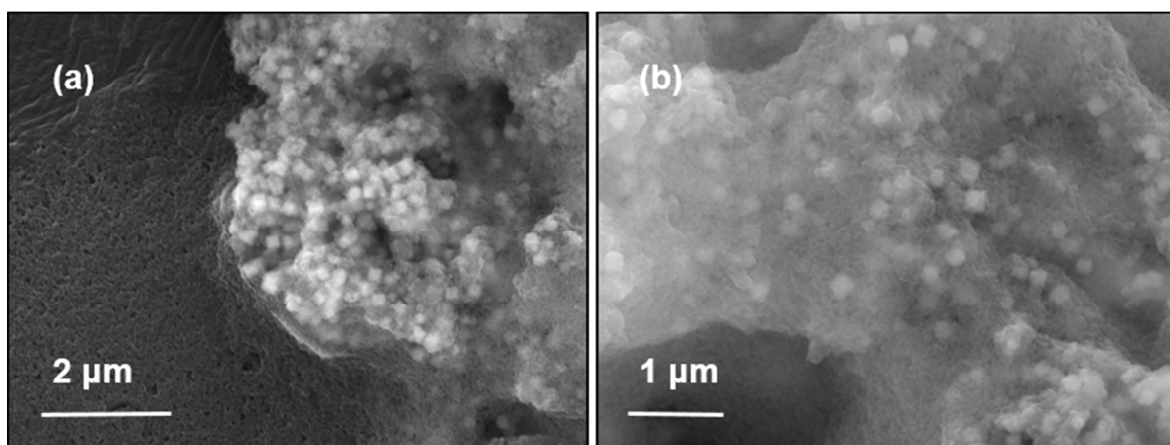

*Figure S5* SEM image of  $\text{Cu}^{2+}$ -LTL reduced with Sodium borohydride. Cubic shaped copper nanoparticles on the surface of nanosized LTL crystals are observed.

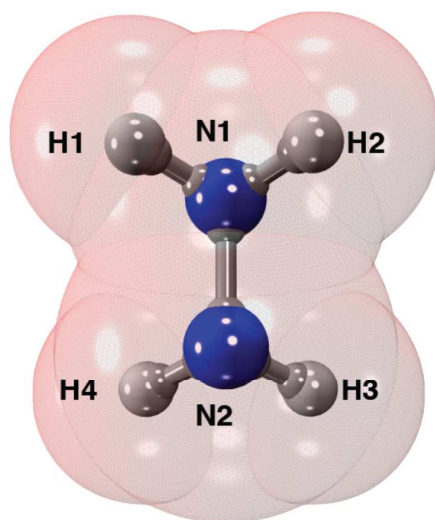

*Van der Waals surface*

| Atoms | d, Å     |
|-------|----------|
| H1-H2 | 1.62     |
| H1-H3 | 2.90     |
| H1-H4 | 2.41     |
| N1-N2 | 1.44     |
| Atoms | Radii, Å |
| H     | 0.53     |
| N     | 0.56     |

*Figure S6* Van der Waals size of Hydrazine molecule

*Table S3* Analysis of Bragg peak area of the XRD patterns collected at different key times of the reaction.

| <b>Sample</b><br><b>Cu<sup>2+</sup>-LTL</b> | <b>X<sub>beg</sub></b> | <b>X<sub>end</sub></b> | <b>Y<sub>max</sub></b> | <b>X(Y<sub>Max</sub>)</b> | <b>Peak Area</b> |
|---------------------------------------------|------------------------|------------------------|------------------------|---------------------------|------------------|
| <b>0 min</b>                                | 42.90                  | 43.70                  | 43.08                  | 43.61                     | 0.04             |
| <b>70 min</b>                               | 42.90                  | 43.70                  | 37.19                  | 43.65                     | -0.06            |
| <b>190 min</b>                              | 42.90                  | 43.70                  | 140.00                 | 43.29                     | 44.24            |
| <b>280 min</b>                              | 42.90                  | 43.70                  | 263.00                 | 43.33                     | 56.23            |
| <b>430 min</b>                              | 42.90                  | 43.70                  | 258.00                 | 43.31                     | 64.25            |
| <b>960 min</b>                              | 42.90                  | 43.70                  | 309.00                 | 43.33                     | 92.42            |

X<sub>beg</sub>-X<sub>end</sub> – peak position

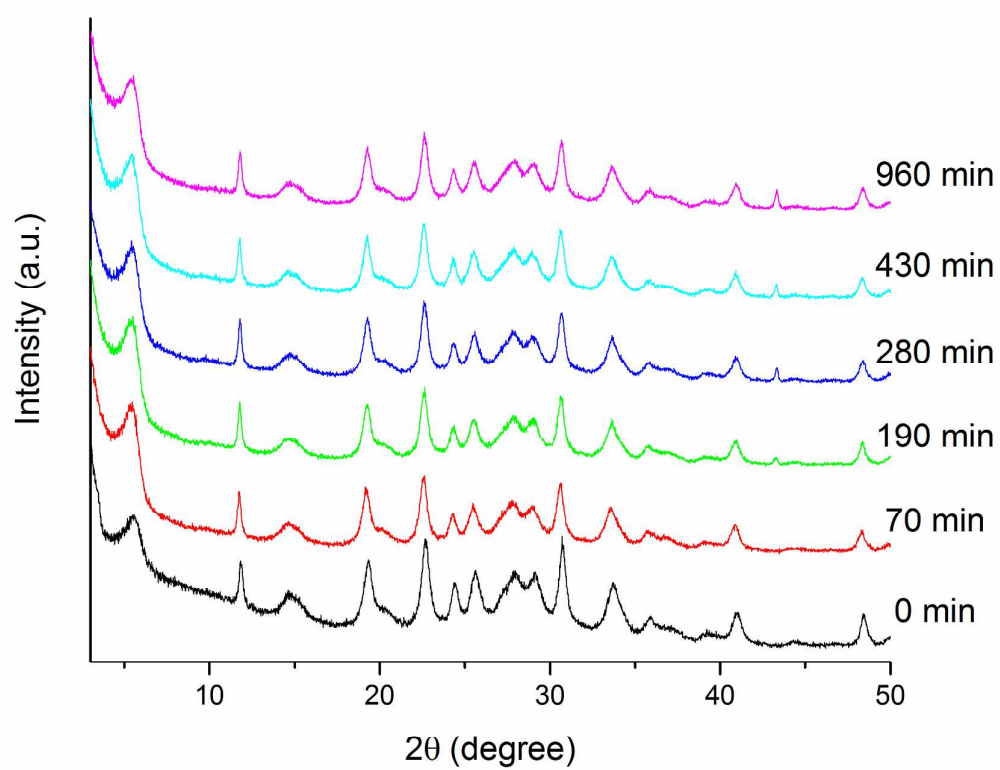

*Figure S7* XRD patterns of samples at different reaction time in the region 4 - 50 °2 $\theta$ . The LTL zeolite structure stays intact during the reduction process.

(A)

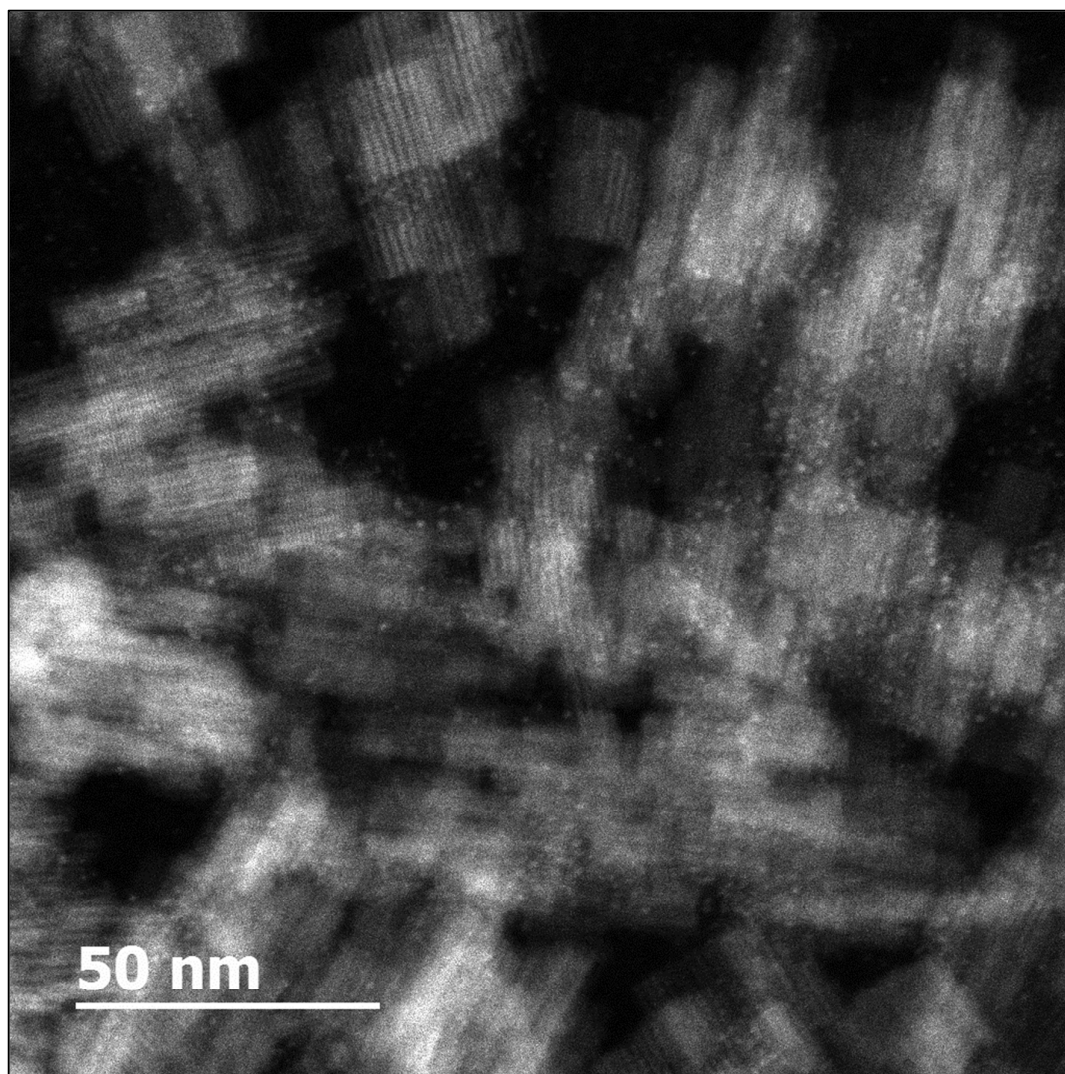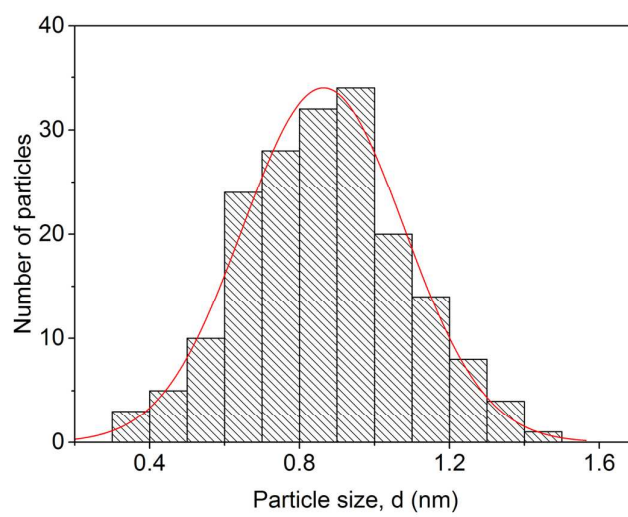



(B)

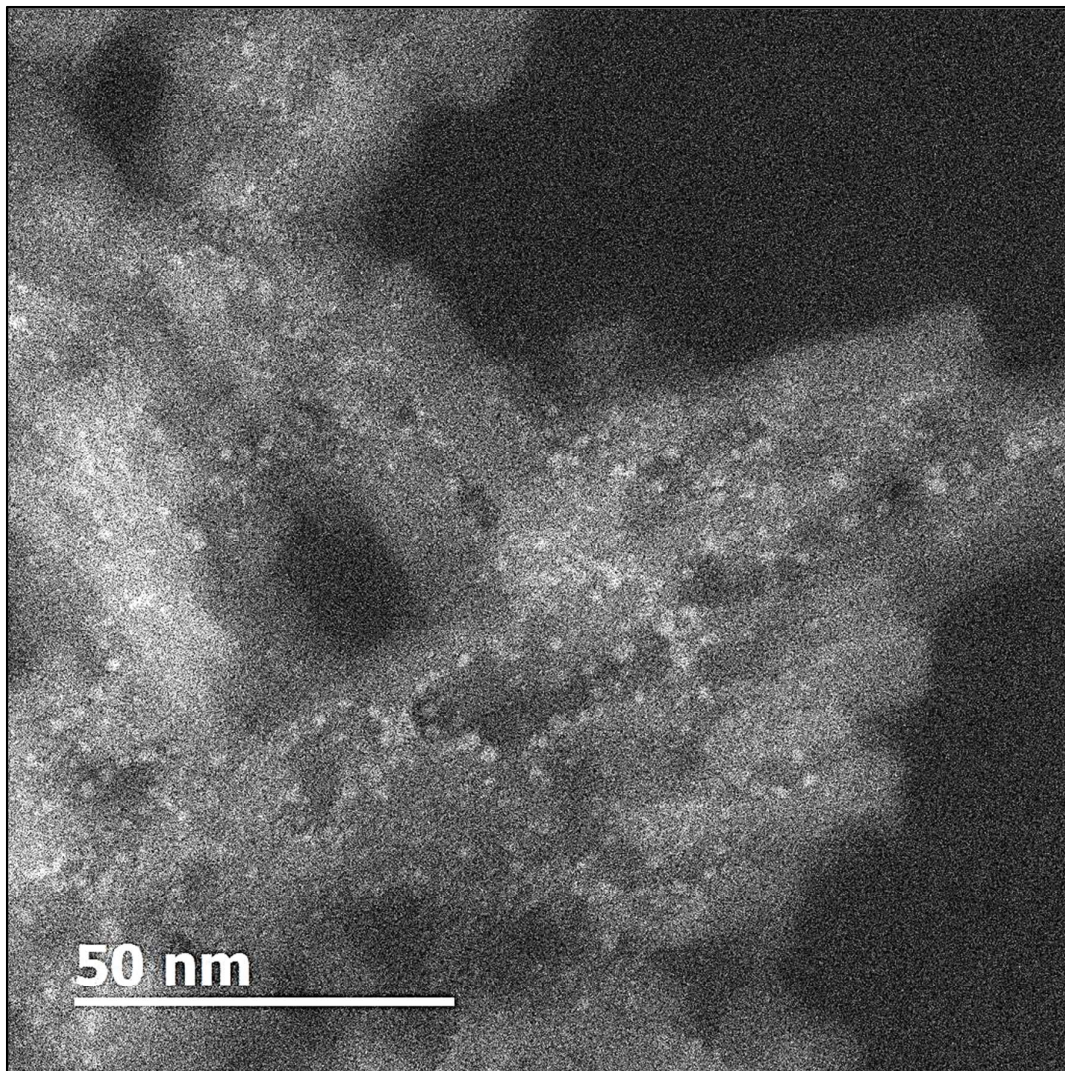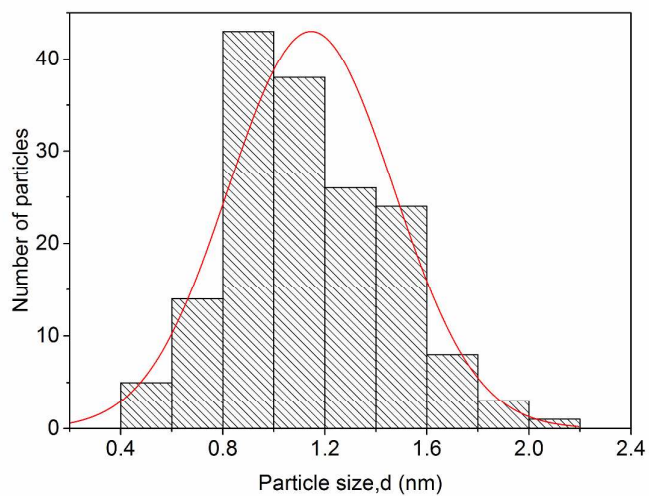

*Figure S8* HAADF-STEM images of zeolite samples reduced with hydrazine for (A) 190 min, (B) 280 min with histograms of particle size distribution. The bright spots represent copper nanoparticles.

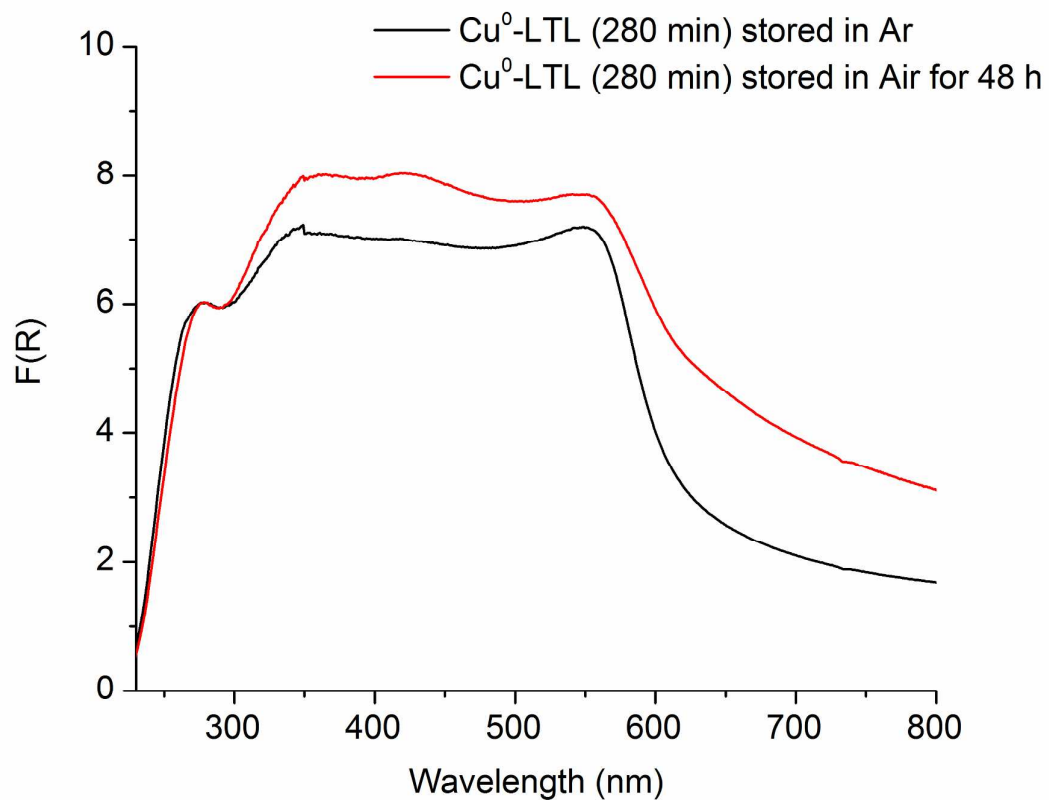

*Figure S9* UV-vis spectra of self-supported pellets of copper-containing LTL recorded after storing the sample in Ar atmosphere (black) and after storing in air for 48 hours (red). A new peak at 420 nm assigned to  $\text{Cu}_2\text{O}^1$  appeared in the red spectrum.



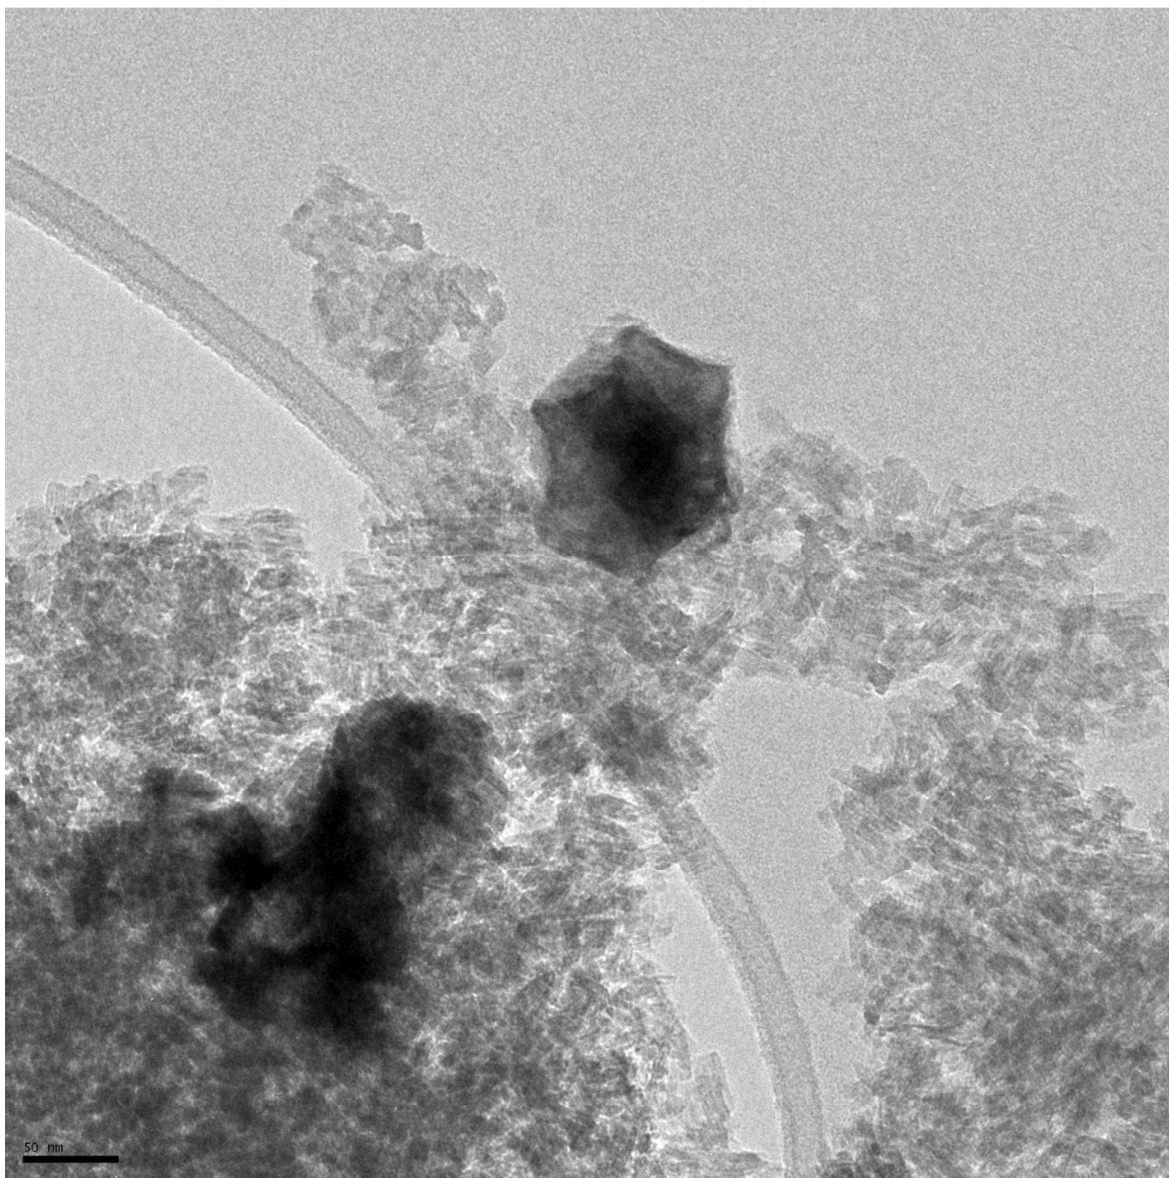

*Figure S10* TEM picture of sample Cu<sup>0</sup>-LTL (280 min) after continuous heating under Ar flow at 400 °C for 4 hours.

#### Reference

- (1) Susman, M. D.; Feldman, Y.; Vaskevich, A.; Rubinstein, I. Chemical Deposition and Stabilization of Plasmonic Copper Nanoparticle Films on Transparent Substrates. *Chem. Mater.* **2012**, *24* (13), 2501–2508.
